# Supplementary material
Source: Springer Nature journal article supplement (https://www.springerprofessional.de/resource/supplementary/13638_2013_1054_MOESM1_ESM.pdf/11898864)
Supplement: MOESM1 [file 11898864]

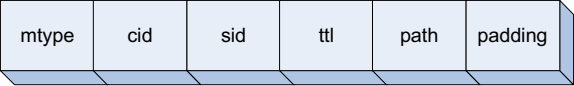

mtype: message type (RDIS / FRDIS)

cid: sequence number of routing-refreshing cycle

sid: identifier of the node sending the message

ttl: Time to Live

path: set of identifiers of nodes that the message visited

padding: is variable in message size
